# Supplementary material for: Genome-Wide Investigation of MicroRNAs and Their Targets in Response to Freezing Stress in Medicago sativa L., Based on High-Throughput Sequencing
Source: PubMed Central journal article supplement (PMC4777136; doi:10.1534/g3.115.025981), 2016-01-20
Supplement: supp_g3.115.025981_FigureS1.pdf [file supp_g3.115.025981_FigureS1.pdf]

## Supplements

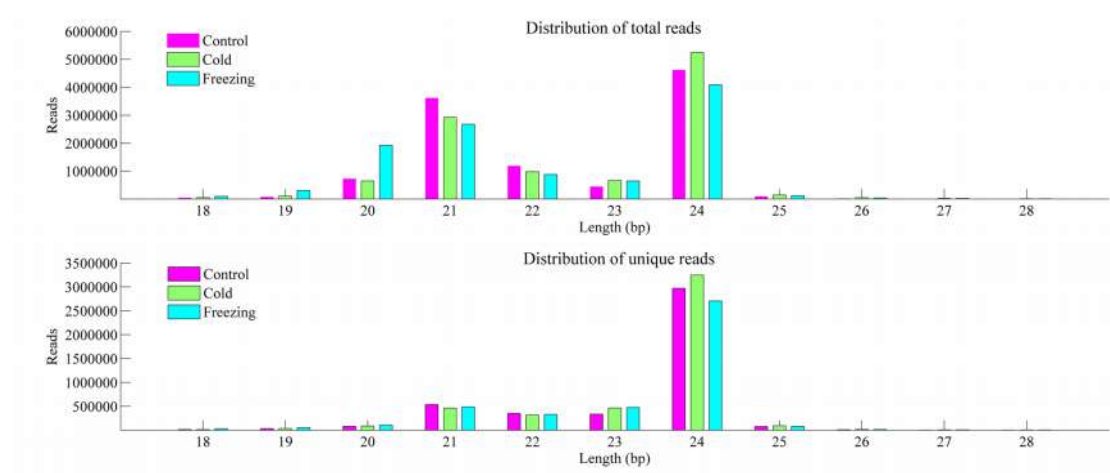

**Figure S1** Distribution of miRNA reads in three alfalfa libraries.
