# Supplementary material for: Genome-Wide Investigation of MicroRNAs and Their Targets in Response to Freezing Stress in Medicago sativa L., Based on High-Throughput Sequencing
Source: PubMed Central journal article supplement (PMC4777136; doi:10.1534/g3.115.025981), 2016-01-20
Supplement: supp_g3.115.025981_TableS7.pdf [file supp_g3.115.025981_TableS7.pdf]

**Table S7 The differentially expression of target genes in alfalfa response to cold and/or freezing stresses.** Expressions of target genes (FPKM method, fragments per kilobase of exon per million fragments mapped) were calculated by TopHat and Cufflinks. Differential expression of target genes were identified by package edgeR, with  $|\log_2(\text{fold change})| \geq 1$  and p-value  $\leq 0.01$ . The correlations (Person correlation coefficients) between expression of miRNA and their target genes were analysis using R (cor command).

| miRNA      | Target     | Expression |        |          | Correlation |
|------------|------------|------------|--------|----------|-------------|
|            |            | Control    | Cold   | Freezing |             |
| miR167a    | MsUN007721 | 7.54       | 20.31  | 46.15    | -0.85       |
| miR396a-5p | MsUN018812 | 2.71       | 4.84   | 6.90     | -0.92       |
| miR396a-5p | MsUN037724 | 7.21       | 2.55   | 5.90     | 0.64        |
| miR396a-5p | MsUN038845 | 3.62       | 0.68   | 12.28    | -0.38       |
| miR5239    | MsUN031868 | 3.14       | 0.99   | 7.41     | -0.50       |
| NmiR0028   | MsUN045647 | 25.91      | 128.50 | 37.47    | -0.46       |
