# Supplementary material for: Genome-Wide Investigation of MicroRNAs and Their Targets in Response to Freezing Stress in Medicago sativa L., Based on High-Throughput Sequencing
Source: PubMed Central journal article supplement (PMC4777136; doi:10.1534/g3.115.025981), 2016-01-20
Supplement: supp_g3.115.025981_TableS8.pdf [file supp_g3.115.025981_TableS8.pdf]

**Table S8 Function annotation of miRNAs targets excluding TFs identified by degradome sequencing.** The target genes were firstly scanned TF genes by iTAK software, and remains were annotated by BLASTX against combination databases of Arabidopsis, rice, soybean, and Medicago truncatula proteins. The annotation information of hits with e-value lower than 1E-5 were retrieved.

| miRNA    | Target     | Annotation information                                            |
|----------|------------|-------------------------------------------------------------------|
| miR160   | MsUN020597 | alpha/beta-Hydrolases superfamily protein                         |
|          | MsUN020599 | alpha/beta-Hydrolases superfamily protein                         |
| miR167   | MsUN012385 | Transducin/WD40 repeat-like superfamily protein                   |
| miR168   | MsUN040125 | dehydrin family protein                                           |
|          | MsUN016316 | Galactose oxidase/kelch repeat superfamily protein                |
| miR396   | MsUN050298 | F-box/RNI-like superfamily protein                                |
| miR398   | MsUN006428 | Terpenoid cyclases/Protein prenyltransferases superfamily protein |
| miR1509  | MsUN050005 | Carbohydrate-binding X8 domain superfamily protein                |
|          | MsUN081284 | Subtilase family protein                                          |
|          | MsUN097071 | reduced male fertility                                            |
| miR2592  | MsUN086833 | Protein kinase family protein                                     |
|          | MsUN111458 | F-box and associated interaction domains-containing protein       |
| miR2612  | MsUN090041 | cofactor of nitrate reductase and xanthine dehydrogenase 2        |
|          | MsUN090042 | cofactor of nitrate reductase and xanthine dehydrogenase 2        |
| miR2616  | MsUN082240 | DNAJ heat shock N-terminal domain-containing protein              |
|          | MsUN039546 | Protein kinase superfamily protein                                |
| miR2643  | MsUN102436 | Small nuclear ribonucleoprotein family protein                    |
|          | MsUN102457 | Small nuclear ribonucleoprotein family protein                    |
| miR5037  | MsUN046365 | production of anthocyanin pigment 1                               |
|          | MsUN008813 | aspartate aminotransferase 4                                      |
|          | MsUN010070 | histidine triad nucleotide-binding 4                              |
|          | MsUN018393 | ARM repeat superfamily protein                                    |
| miR5213  | MsUN036655 | unknown protein                                                   |
|          | MsUN038569 | Ankyrin repeat family protein                                     |
|          | MsUN079376 | succinate dehydrogenase subunit 4                                 |
|          | MsUN091135 | unknown protein                                                   |
| miR5231  | MsUN106315 | PDI-like 5-1                                                      |
| miR5239  | MsUN031868 | Putative serine esterase family protein                           |
| miR5239  | MsUN048390 | Putative serine esterase family protein                           |
| miR5249  | MsUN045450 | ubiquitin-conjugating enzyme 13                                   |
| miR5257  | MsUN024706 | galacturonosyltransferase 10                                      |
| miR5261  | MsUN095228 | N-acetyl-l-glutamate kinase                                       |
| miR5266  | MsUN042197 | KAR-UP F-box 1                                                    |
| miR5270  | MsUN009940 | germin-like protein subfamily 2 member 2 precursor                |
| miR7701  | MsUN045409 | Cytochrome bd ubiquinol oxidase, 14kDa subunit                    |
| NmiR0006 | MsUN040404 | inositol-pentakisphosphate 2-kinase 1                             |
| NmiR0018 | MsUN005346 | Pentatricopeptide repeat (PPR) superfamily protein                |

---

|          |            |                                                             |
|----------|------------|-------------------------------------------------------------|
|          | MsUN038572 | Pentatricopeptide repeat (PPR) superfamily protein          |
|          | MsUN105188 | Pentatricopeptide repeat (PPR) superfamily protein          |
|          | MsUN115233 | Pentatricopeptide repeat (PPR) superfamily protein          |
| NmiR0026 | MsUN102436 | Small nuclear ribonucleoprotein family protein              |
|          | MsUN102457 | Small nuclear ribonucleoprotein family protein              |
| NmiR0027 | MsUN014896 | Tetratricopeptide repeat (TPR)-like superfamily protein     |
| NmiR0029 | MsUN093434 | alpha/beta-Hydrolases superfamily protein                   |
|          | MsUN019866 | Pentatricopeptide repeat (PPR) superfamily protein          |
|          | MsUN023956 | Pentatricopeptide repeat (PPR) superfamily protein          |
| NmiR0041 | MsUN032442 | Pentatricopeptide repeat (PPR) superfamily protein          |
|          | MsUN046783 | Pentatricopeptide repeat (PPR) superfamily protein          |
|          | MsUN094467 | MAP kinase 9                                                |
| NmiR0053 | MsUN089400 | F-box and associated interaction domains-containing protein |
| NmiR0063 | MsUN113450 | BSD domain-containing protein                               |

---
